# Supplementary material for: AAV-Mediated Expression of Broadly Neutralizing and Vaccine-like Antibodies Targeting the HIV-1 Envelope V2 Region
Source: PubMed Central journal article supplement — Mol Ther Methods Clin Dev. 2019 Jun 12;14:100–12. doi: 10.1016/j.omtm.2019.06.002 (PMC6616373; doi:10.1016/j.omtm.2019.06.002), 2019-06-12
Supplement: mmc1.pdf [file mmc1.pdf]

**Supplemental Information**

**AAV-Mediated Expression of Broadly Neutralizing  
and Vaccine-like Antibodies Targeting  
the HIV-1 Envelope V2 Region**

**Fiona T. van den Berg, Nigel A. Makoah, Stuart A. Ali, Tristan A. Scott, Rutendo E. Mapengo, Lorraine Z. Mutsvunguma, Nonhlanhla N. Mkhize, Bronwen E. Lambson, Prudence D. Kgagudi, Carol Crowther, Salim S. Abdool Karim, Alejandro B. Balazs, Marc S. Weinberg, Abdullah Ely, Patrick B. Arbutnot, and Lynn Morris**

**SUPPLEMENTAL INFORMATION**

**Table S1. Expression levels of secreted antibodies in cell media.**

Antibodies secreted in cell media following infection of HEK293T cells with AAV2- or AAV8-antibody vectors were detected using ELISA and quantified using a purified IgG antibody to generate a standard curve.

| Antibody   | Concentration (µg/ml) |      |
|------------|-----------------------|------|
|            | AAV2                  | AAV8 |
| VRC01      | 14.3                  | 1.2  |
| PGT121     | 0.6                   | 0.3  |
| CAP256.08  | 1.9                   | 0.6  |
| CAP256.09  | 7.6                   | 0.6  |
| CAP256.16  | 23.0                  | 0.6  |
| CAP256.21  | 12.6                  | 1.3  |
| CAP256.25  | 15.7                  | 0.9  |
| CAP228-16H | 18.7                  | 1.6  |
| CAP228-19F | 19.6                  | 1.3  |

**Table S2. Summary of correlation between antibody and anti-antibody expression.**

Correlation between antibody expression (µg/ml) and anti-antibody expression (OD<sub>450</sub>) was assessed using a Pearson correlation test (two-tailed p-value,  $\alpha = 0.05$ ). p value: ns: not significant,  $p > 0.05$ ; \*:  $0.01 > p \leq 0.05$ ; \*\*:  $0.001 > p \leq 0.01$ ; \*\*\*  $p \leq 0.001$ ; \*\*\*\*  $p \leq 0.0001$

| Summary        |      |                |                           |           |         |              |
|----------------|------|----------------|---------------------------|-----------|---------|--------------|
| Antibody group | Week | Number of Mice | Correlation coefficient r | r squared | p Value | Significance |
| All            | 2    | 53             | -0.57                     | 0.33      | <0.0001 | ****         |
|                | 24   | 53             | -0.28                     | 0.08      | 0.041   | *            |
| All CAP256     | 2    | 33             | -0.44                     | 0.19      | 0.0110  | *            |
|                | 24   | 33             | -0.43                     | 0.19      | 0.0123  | *            |
| All CAP228     | 2    | 15             | -0.39                     | 0.15      | 0.1557  | ns           |
|                | 24   | 15             | -0.40                     | 0.16      | 0.1449  | ns           |
| VRC01          | 2    | 5              | -0.67                     | 0.45      | 0.214   | ns           |
|                | 24   | 5              | -0.72                     | 0.52      | 0.168   | ns           |
| CAP256.08      | 2    | 9              | -0.87                     | 0.76      | 0.0021  | **           |
|                | 24   | 9              | -0.49                     | 0.24      | 0.185   | ns           |
| CAP256.09      | 2    | 6              | -0.33                     | 0.11      | 0.526   | ns           |
|                | 24   | 6              | -0.67                     | 0.45      | 0.143   | ns           |
| CAP256.16      | 2    | 5              | -0.84                     | 0.70      | 0.0765  | ns           |
|                | 24   | 5              | -0.70                     | 0.49      | 0.186   | ns           |
| CAP256.21      | 2    | 6              | -0.90                     | 0.82      | 0.0134  | *            |
|                | 24   | 6              | -0.25                     | 0.06      | 0.633   | ns           |
| CAP256.25      | 2    | 7              | -0.56                     | 0.32      | 0.188   | ns           |
|                | 24   | 7              | -0.27                     | 0.07      | 0.565   | ns           |
| CAP228.16H     | 2    | 7              | -0.53                     | 0.29      | 0.216   | ns           |
|                | 24   | 7              | -0.37                     | 0.13      | 0.418   | ns           |
| CAP228.19F     | 2    | 8              | 0.52                      | 0.27      | 0.184   | ns           |
|                | 24   | 8              | -0.29                     | 0.09      | 0.481   | ns           |

**Table S3. Primer sequences used to amplify common elements of the antibody expression cassette.**

| Primer | Sequence (5' – 3')                                               |
|--------|------------------------------------------------------------------|
| SS F   | GTCCTGGGTGACGAACAGGC                                             |
| SS R   | TGCCGAGCCCTCCTGTAACCA                                            |
| HC G F | GTTACAGGAGGGCTCGGCACGAGACGGATATCCGTCTCAGCGAGACCAAGGGCCCATCGGTC   |
| HC G R | GAGGGGGCAGCCTTGGGCTGACCCGAGACGTTTCGCGACGTCTCTTGCCGAGCCCTTTGGAGCC |
| LC F   | GGTCAGCCCAAGGCTGCC                                               |
| LC R   | TGTAATCCAGAGGTTGATTAGGATCCTTTATGAACATTCTGTAGGGGCCAC              |

*BsmBI* recognition sites are underlined.

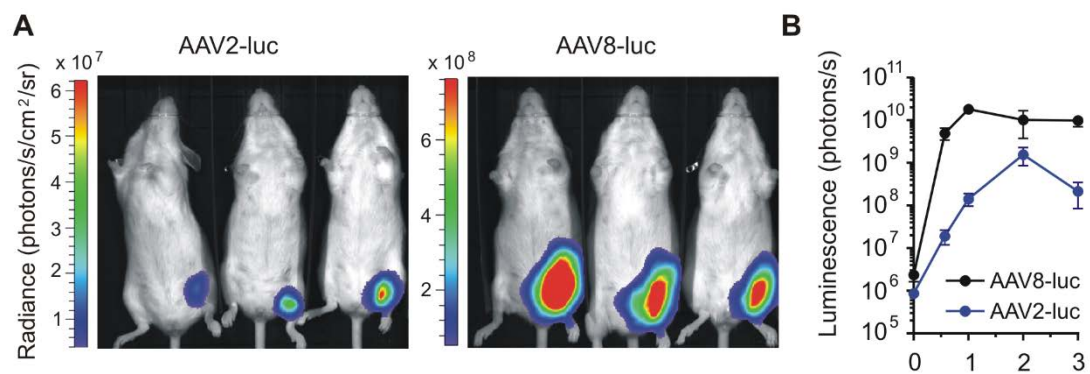

**Figure S1. Bioluminescence of mice treated with AAV2-Fluc or AAV8-Fluc.**

**A.** Representative bioluminescence images with 5 s exposure of mice at week 1 that received  $1 \times 10^{10}$  viral genome copies of the AAV2-Fluc or AAV8-Fluc. **B.** Mean luminescence for the AAV2-Fluc ( $n = 6$ ) and AAV8-Fluc ( $n = 6$ ) control groups. Luminescence was measured using unsaturated images acquired with a 5 s exposure and quantified as total flux (photons/s). Error bars: standard error of the mean.

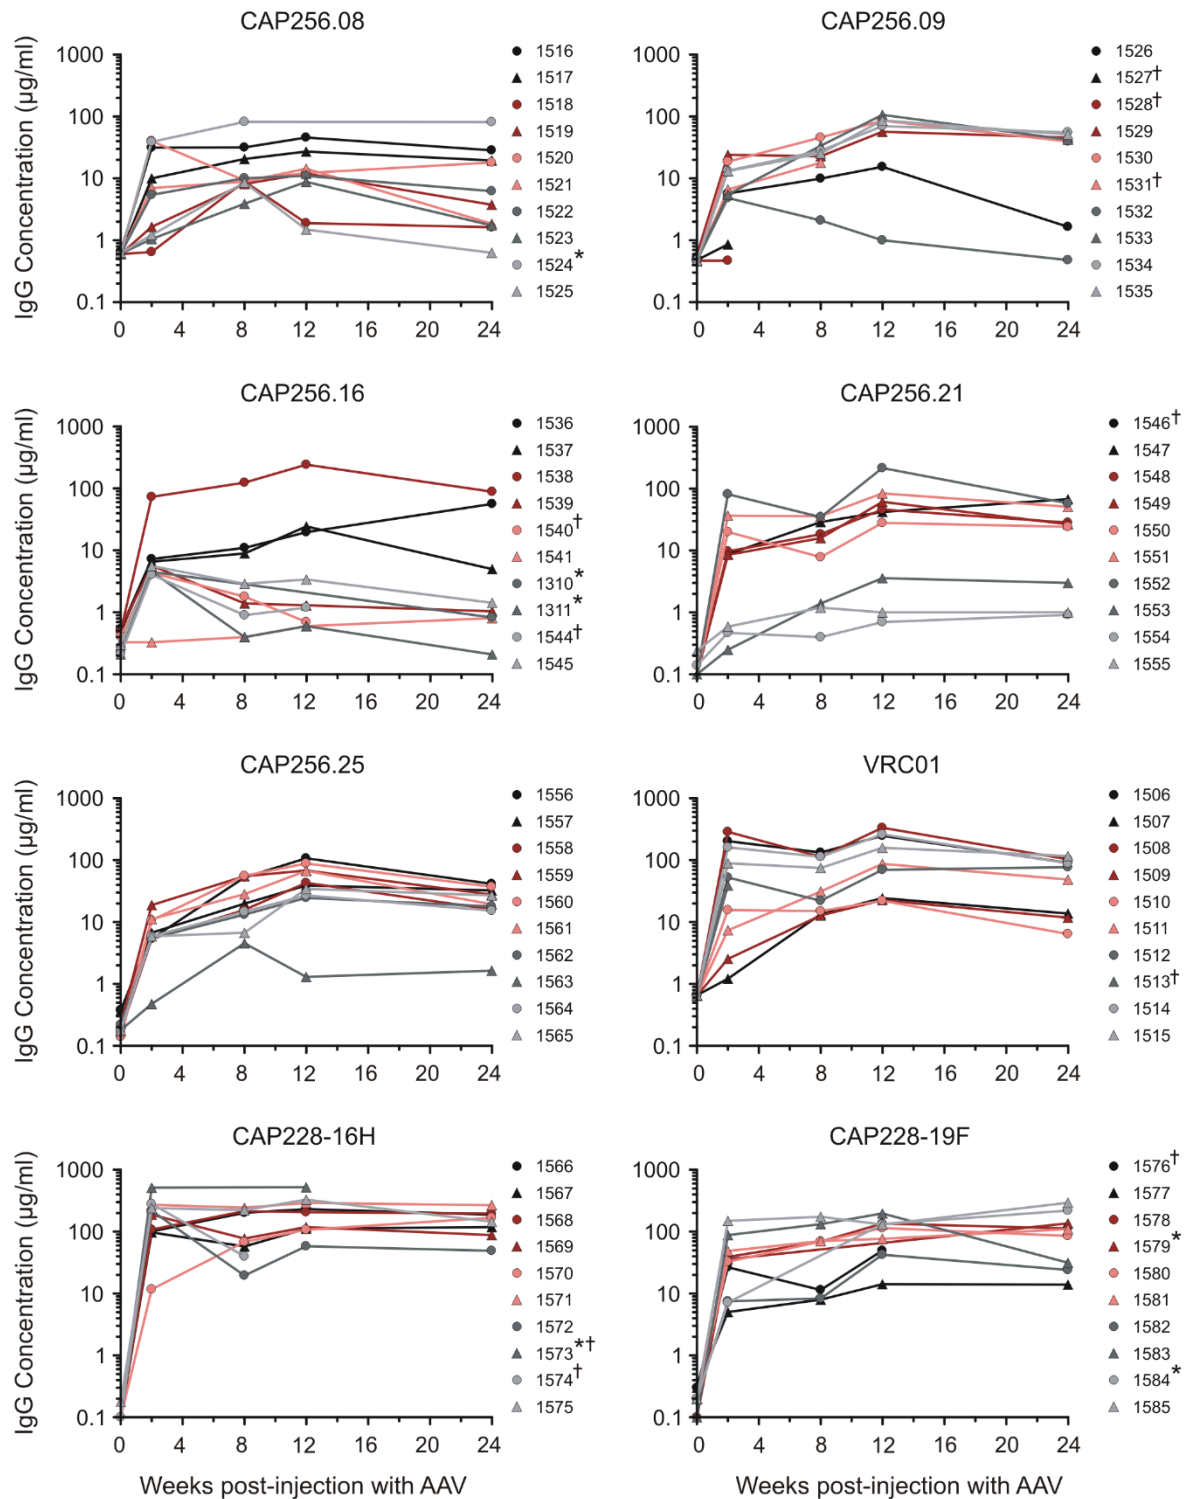

† Mice died or were euthanized.  
 \* No sample available at one or more time points.

**Figure S2. Human IgG antibody levels in individual mice over 24 weeks.**

The antibody serum concentrations for NMRI mice were measured by sandwich ELISA over 24 weeks post-AAV8 infection. Results are shown for individual mice in each treatment group (n = 7 – 10). Ten mice were euthanized for several reasons or died with several causes identified by post-mortem: failure to recover from anaesthetic (3); enteritis (1); non-healing skin wound (1); serious skin reaction to metal ear tag (1); abdominal tumour (2); apparent hind limb paralysis (1) and gastrointestinal abnormalities (1). No serum sample was available at certain time points for some mice because a low volume of blood was collected. Alternatively, a mouse was omitted from a specific blood sample collection point because of concerns over health or weight.
